# Supplementary material
Source: PubMed Central journal article supplement (PMC5218825)
Supplement: NIHMS751426-supplement.pdf [file NIHMS751426-supplement.pdf]

## Callosal Abnormalities Across the Psychosis Dimension: Bipolar Schizophrenia Network on Intermediate Phenotypes

### *Supplemental Information*

**Table S1. Socio-demographic and clinical characteristics of the study sample**

| Demographic Characteristics | SZ [224]         |         | SZA [142]        |         | PBD [190]        |         | Unaffected Relatives [483] |         | Controls [342]   |         | Test statistic<br><i>F / X<sup>2</sup></i> | <i>p</i> |
|-----------------------------|------------------|---------|------------------|---------|------------------|---------|----------------------------|---------|------------------|---------|--------------------------------------------|----------|
|                             | Mean or <i>n</i> | SD or % | Mean or <i>n</i> | SD or % | Mean or <i>n</i> | SD or % | Mean or <i>n</i>           | SD or % | Mean or <i>n</i> | SD or % |                                            |          |
| Age, Years                  | 35.03            | 12.4    | 37.6             | 12.7    | 35.74            | 12.2    | 41.28                      | 15.7    | 37.32            | 12.4    | 1.24                                       | 0.29     |
| Sex, Male                   | 149              | 65%     | 64               | 45%     | 59               | 31%     | 145                        | 30%     | 156              | 46%     | 16.6                                       | .001     |
| Education, Years            | 12.8             | 2.5     | 13.3             | 2.5     | 14.2             | 2.5     | 14.5                       | 2.8     | 14.5             | 2.3     | 5.59                                       | .001     |
| Age of Illness Onset        | 20.4             | 8.3     | 19               | 9.4     | 19.8             | 9.2     | -                          | -       | -                | -       | 0.46                                       | .63      |
| PANSS Total                 | 75.9             | 15.7    | 74.6             | 14      | 58.8             | 13.6    | -                          | -       | -                | -       | 4.0                                        | .01      |
| PANSS Positive              | 19.4             | 4.9     | 20.3             | 4.1     | 13.8             | 4.2     | -                          | -       | -                | -       | 2.52                                       | .08      |
| PANSS Negative              | 19.2             | 6.3     | 16.1             | 4.6     | 13.4             | 4.3     | -                          | -       | -                | -       | 2.82                                       | .057     |
| PANSS General               | 37.3             | 7.8     | 38.2             | 7.8     | 31.6             | 7.9     | -                          | -       | -                | -       | 16.24                                      | .001     |
| YMRS                        | 7.2              | 5.8     | 8.4              | 5.5     | 5.8              | 6.2     | -                          | -       | -                | -       | 4.81                                       | .009     |
| MADRS                       | 10.1             | 8.1     | 14.5             | 9.6     | 10.9             | 9.3     | -                          | -       | -                | -       | 3.79                                       | .02      |
| All Medication              | 210              | 92%     | 140              | 97%     | 183              | 95%     | 408                        | 84%     | 152              | 44%     | 340.08                                     | <.001    |
| Antipsychotics-all          | 199              | 88%     | 123              | 85%     | 133              | 69%     | 55                         | 12%     | -                | -       | 438.66                                     | <.001    |
| First Gen                   | 24               | 10%     | 12               | 8%      | 11               | 5%      | 7                          | 1.4%    | -                | -       | 24.48                                      | <.001    |
| Second Gen                  | 175              | 77%     | 111              | 77%     | 122              | 64%     | 48                         | 10%     | -                | -       | 365.14                                     | <.001    |
| Antidepressant-any          | 69               | 30%     | 59               | 41%     | 59               | 31%     | 27                         | 5.6%    | -                | -       | 122.26                                     | <.001    |
| Tricyclic                   | 1                | .4%     | 3                | 2%      | 5                | 2.6%    | 5                          | 1%      | -                | -       | 5.51                                       | .13      |

| Demographic Characteristics          | SZ [224]         |         | SZA [142]        |         | PBD [190]        |         | Unaffected Relatives [483] |         | Controls [342]   |         | Test statistic<br><i>F / X<sup>2</sup></i> | <i>p</i> |
|--------------------------------------|------------------|---------|------------------|---------|------------------|---------|----------------------------|---------|------------------|---------|--------------------------------------------|----------|
|                                      | Mean or <i>n</i> | SD or % | Mean or <i>n</i> | SD or % | Mean or <i>n</i> | SD or % | Mean or <i>n</i>           | SD or % | Mean or <i>n</i> | SD or % |                                            |          |
| Anticonvulsants                      | 32               | 14%     | 60               | 41.6%   | 82               | 42.9%   | 31                         | 6.4%    | -                | -       | 180.47                                     | <.001    |
| Lithium                              | 15               | 6.6%    | 17               | 11.8%   | 60               | 31.4%   | 5                          | 1%      | -                | -       | 162.35                                     | <.001    |
| SSRI                                 | 51               | 22.4%   | 39               | 27%     | 42               | 21.9%   | 88                         | 18.2%   | -                | -       | 6.34                                       | .097     |
| Anticholinergic/<br>Antiparkinsonian | 38               | 16.7%   | 18               | 12.5%   | 14               | 7.3%    | 6                          | 1.2%    | -                | -       | 50.8                                       | <.001    |
| Anxiolytic/Sedatives                 | 52               | 22.9%   | 46               | 31.9%   | 62               | 32.4%   | 57                         | 11.8%   | -                | -       | 52.06                                      | <.001    |

MADRS, Montgomery–Åsberg Depression Rating Scale; PANSS, Positive and Negative Syndrome Scale; YMRS, Young Mania Rating Scale.

**Table S2. Heritability index for the CC volumes across the psychosis spectrum**

| Region             | H2r       | <i>p</i> | H2rStdErr |
|--------------------|-----------|----------|-----------|
| Genu               | 0.709544  | 2.37E-16 | 0.0810447 |
| Truncus            | 0.5937706 | 6.21E-12 | 0.0846777 |
| Midbody            | 0.5667775 | 8.75E-12 | 0.0815031 |
| Anterior Splenium  | 0.6017501 | 7.37E-12 | 0.0854678 |
| Posterior Splenium | 0.7775244 | 1.26E-19 | 0.0786434 |

**Table S3. Posterior splenium volumes against BACS cognitive test scores**

| Brief Assessment of Cognitive Function | Partial Correlations: Posterior splenium against BACS cognitive test scores. [ <i>r</i> values] |          |        |       |           |         |         |
|----------------------------------------|-------------------------------------------------------------------------------------------------|----------|--------|-------|-----------|---------|---------|
|                                        | HC                                                                                              | Probands |        |       | Relatives |         |         |
|                                        |                                                                                                 | SZ       | SZA    | PBD   | SZ-Rel    | SZA-Rel | PBD-Rel |
| Complete Score                         | 0.02                                                                                            | 0.13     | -0.007 | 0.15  | 0.33**    | 0.09    | -0.13   |
| Verbal Memory                          | -0.06                                                                                           | 0.12     | 0.02   | 0.15  | 0.34**    | 0.085   | -0.13   |
| Digit Sequencing                       | -0.02                                                                                           | 0.13     | -0.06  | 0.11  | 0.13      | 0.087   | -0.13   |
| Token Motor                            | 0.17*                                                                                           | 0.02     | 0.06   | 0.14  | 0.13      | 0.085   | -0.13   |
| Verbal Fluency                         | 0.005                                                                                           | 0.12     | -0.001 | 0.085 | 0.31*     | 0.086   | -.047   |
| Symbol Coding                          | 0.05                                                                                            | 0.14     | -0.1   | 0.13  | 0.24*     | 0.085   | -0.13   |
| Tower Test                             | 0.001                                                                                           | 0.09     | 0.03   | 0.02  | 0.14      | 0.084   | -0.13   |

\*\* *p* < 0.001 Hochberg corrected;

\* *p* < 0.01.

**Table S4. Anterior splenium volumes against BACS cognitive test scores**

| Brief Assessment of<br>Cognitive Function | Partial Correlations: Anterior splenium against BACS cognitive test scores.<br>[ <i>r</i> values] |          |        |       |           |         |         |
|-------------------------------------------|---------------------------------------------------------------------------------------------------|----------|--------|-------|-----------|---------|---------|
|                                           | HC                                                                                                | Probands |        |       | Relatives |         |         |
|                                           |                                                                                                   | SZ       | SZA    | PBD   | SZ-Rel    | SZA-Rel | PBD-Rel |
| Complete Score                            | 0.20*                                                                                             | 0.07     | 0.11   | 0.15  | 0.13      | 0.123   | -0.16   |
| Verbal Memory                             | 0.09                                                                                              | 0.13     | 0.1    | 0.17* | 0.05      | 0.126   | -0.16   |
| Digit Sequencing                          | 0.09                                                                                              | 0.05     | -0.06  | 0.18* | 0.02      | 0.124   | -0.16   |
| Token Motor                               | 0.19*                                                                                             | -0.07    | 0.06   | 0.04  | 0.06      | 0.123   | -0.16   |
| Verbal Fluency                            | 0.14                                                                                              | 0.08     | -0.001 | 0.19* | 0.20      | 0.12    | -0.17   |
| Symbol Coding                             | 0.23*                                                                                             | 0.13     | -0.1   | 0.07  | 0.03      | 0.12    | -0.16   |
| Tower Test                                | 0.11                                                                                              | 0.07     | 0.03   | -0.03 | 0.09      | 0.13    | -0.16   |

\*  $p < 0.01$ .

**Table S5. Correlations: Positive and Negative Syndrome Scale (PANSS)**

| CC - Region                      | PANSS - Positive |          | PANSS - Negative |          | PANSS - Total |          |
|----------------------------------|------------------|----------|------------------|----------|---------------|----------|
|                                  | <i>r</i>         | <i>p</i> | <i>r</i>         | <i>p</i> | <i>r</i>      | <i>p</i> |
| <b>Schizophrenia Probands</b>    |                  |          |                  |          |               |          |
| Posterior Splenium               | -0.051           | 0.47     | -0.05            | 0.48     | -0.08         | 0.25     |
| Anterior Splenium                | -0.15            | 0.03     | -0.046           | 0.52     | -0.137        | 0.055    |
| <b>Schizoaffective Depressed</b> |                  |          |                  |          |               |          |
| Posterior Splenium               | -0.29            | 0.06     | -0.27            | 0.08     | -0.31         | 0.04     |
| Anterior Splenium                | -0.26            | 0.09     | -0.55            | 0.001    | -0.27         | 0.08     |
| <b>Schizoaffective Bipolar</b>   |                  |          |                  |          |               |          |
| Posterior Splenium               | -0.22            | 0.04     | -0.089           | 0.41     | -0.18         | 0.09     |
| Anterior Splenium                | -0.27            | 0.01     | -0.02            | 0.813    | -0.16         | 0.14     |

**Table S6. Effect of age (as a continuous variable)**

| Age                | Correlations: Age and corpus callosum volumes [ <i>r</i> values] |          |         |         |           |         |         |
|--------------------|------------------------------------------------------------------|----------|---------|---------|-----------|---------|---------|
|                    | HC                                                               | Probands |         |         | Relatives |         |         |
|                    |                                                                  | SZ       | SZA     | PBD     | SZ-Rel    | SZA-Rel | PBD-Rel |
| Posterior Splenium | 0.05                                                             | -0.10    | -0.05   | 0.06    | 0.19      | 0.26*   | 0.25    |
| Anterior Splenium  | -0.16                                                            | -0.36**  | -0.30** | -0.26** | -0.13     | -0.19   | -0.26   |
| Total CC           | -0.10                                                            | -0.30**  | -0.20   | -0.13   | 0.02      | -0.05   | -0.03   |

\*\*  $p < 0.001$ ;\*  $p < 0.01$ .

**Table S7. Correlations with duration of illness**

| CC - Region        | Schizophrenia |          | Schizoaffective Disorder |          | Bipolar Disorder |          |
|--------------------|---------------|----------|--------------------------|----------|------------------|----------|
|                    | <i>r</i>      | <i>p</i> | <i>r</i>                 | <i>p</i> | <i>r</i>         | <i>p</i> |
| Posterior Splenium | -0.051        | 0.47     | -0.05                    | 0.48     | -0.08            | 0.25     |
| Anterior Splenium  | -0.27         | 0.001    | -0.34                    | 0.001    | -0.23            | 0.002    |
